# Supplementary material for: Molecular assessment of three species of Anilocra (Isopoda, Cymothoidae) ectoparasites from Caribbean coral reef fishes, with the description of Anilocra brillae sp. n
Source: Zookeys. 2017 Mar 27;(663):21–43. doi: 10.3897/zookeys.663.11415 (PMC5523173; doi:10.3897/zookeys.663.11415)
Supplement: Supplementary material 1 — Basepair differences of Anilocra spp. [file zookeys-663-021-s001.xls]

## Sheet: MatrixOutput
Supplemental Table 1. Basepair differences of Anilocra spp. The number identifier in the horizontal header column represents the number and corresponding species listed in the vertical column header.
Anilocra species	1	2	3	4	5	6	7	8	9	10	11	12	13	14	15	16	17	18	19	20	21	22	23	24	25
1. Anilocra chromis
2. Anilocra chromis	6
3. Anilocra chromis	2	4
4. Anilocra chromis	6	4	4
5. Anilocra chromis	2	4	0	4
6. Anilocra chromis	3	5	1	5	1
7. Anilocra chromis	2	4	0	4	0	1
8. Anilocra chromis	3	5	1	5	1	2	1
9. Anilocra brillae sp. n.	35	34	35	32	35	34	35	34
10. Anilocra brillae sp. n.	35	34	35	32	35	34	35	34	0
11. Anilocra brillae sp. n.	35	34	35	32	35	34	35	34	0	0
12. Anilocra brillae sp. n.	34	33	34	31	34	33	34	33	1	1	1
13. Anilocra brillae sp. n.	34	33	34	31	34	33	34	33	1	1	1	0
14. Anilocra brillae sp. n.	34	33	34	31	34	33	34	33	2	2	2	3	3
15. Anilocra brillae sp. n.	37	36	37	34	37	36	37	36	2	2	2	3	3	4
16. Anilocra brillae sp. n.	35	34	35	32	35	34	35	34	0	0	0	1	1	2	2
17. Anilocra haemuli	37	36	37	34	37	36	37	36	17	17	17	16	16	19	19	17
18. Anilocra haemuli	35	34	35	32	35	34	35	34	14	14	14	13	13	16	16	14	3
19. Anilocra haemuli	36	35	36	33	36	35	36	35	15	15	15	14	14	17	17	15	6	3
20. Anilocra haemuli	37	36	37	34	37	36	37	36	16	16	16	15	15	18	18	16	3	2	5
21. Anilocra haemuli	36	35	36	33	36	35	36	35	15	15	15	14	14	17	17	15	4	1	2	3
22. Anilocra haemuli	35	34	35	32	35	34	35	34	14	14	14	13	13	16	16	14	3	0	3	2	1
23. Anilocra haemuli	34	33	34	31	34	33	34	33	13	13	13	12	12	15	15	13	4	1	2	3	2	1
24. EF455818.1 Anilocra physodes	106	108	107	109	107	108	107	106	109	109	109	109	109	107	107	109	106	105	105	107	105	105	106
25. EF455817.1 Anilocra physodes	105	107	106	108	106	107	106	105	107	107	107	107	107	105	107	107	105	104	104	106	104	104	105	13

## Sheet: Caption
Table. Estimates of Evolutionary Divergence between Sequences
The number of base differences per sequence from between sequences are shown. Standard error estimate(s) are shown above the diagonal. The analysis involved 29 nucleotide sequences. Codon positions included were 1st+2nd+3rd+Noncoding. All ambiguous positions were removed for each sequence pair. There were a total of 441 positions in the final dataset. Evolutionary analyses were conducted in MEGA7…
1. Kumar S., Stecher G., and Tamura K. (2015). MEGA7: Molecular Evolutionary Genetics Analysis version 7.0 for bigger datasets.Molecular Biology and Evolution (submitted).
Disclaimer: Although utmost care has been taken to ensure the correctness of the caption, the caption text is provided "as is" without any warranty of any kind. Authors advise the user to carefully check the caption prior to its use for any purpose and report any errors or problems to the authors immediately (www.megasoftware.net). In no event shall the authors and their employers be liable for a…
